# Supplementary material
Source: publisher figshare collection journal article supplement (https://karger.figshare.com/ndownloader/files/25291952)
Supplement: Supplementary file 1 [file 25291952]

**ACCESSORY TABLE 3**. Comparison of the main liver function parameters in cirrhotic patients according to their surveillance status. Categorical variables are reported as absolute frequencies (percentage). Continuous variables are reported as median (interquartile range).

| **Variable** | **Nonsurveyed patients (n=38)** | **Surveyed patients (n=47)** | **p** |
| --- | --- | --- | --- |
| **Bilirubin (mg/dl)** | 0.83 (0.67-1.00) | 0.73 (0.59-1.04) | 0.717 |
| **Albumin (g/L)** | 39 (36-42) | 41 (37-45) | 0.110 |
| **Platelets (10**3/mmc) | 145 (106-197) | 160 (112-205) | 0.814 |
| **Varices** | 11 (28.9) | 11 (23.4) | 0.618 |
| **Ascites** | 3 (7.9) | 2 (4.2) | 0.320 |
| **Encephalopathy** | 0 | 0 | N/A |
